# Supplementary material for: The impact of HIV exposure and maternal Mycobacterium tuberculosis infection on infant immune responses to bacille Calmette-Guérin vaccination
Source: PubMed Central journal article supplement — AIDS. 2015 Jan 7;29(2):155–65. doi: 10.1097/QAD.0000000000000536 (PMC4284011; doi:10.1097/qad.0000000000000536), 2015-01-07
Supplement: aids-29-155-s001.pdf [file aids-29-155-s001.pdf]

## Supplemental Digital Content

### Supplemental Digital Content 1

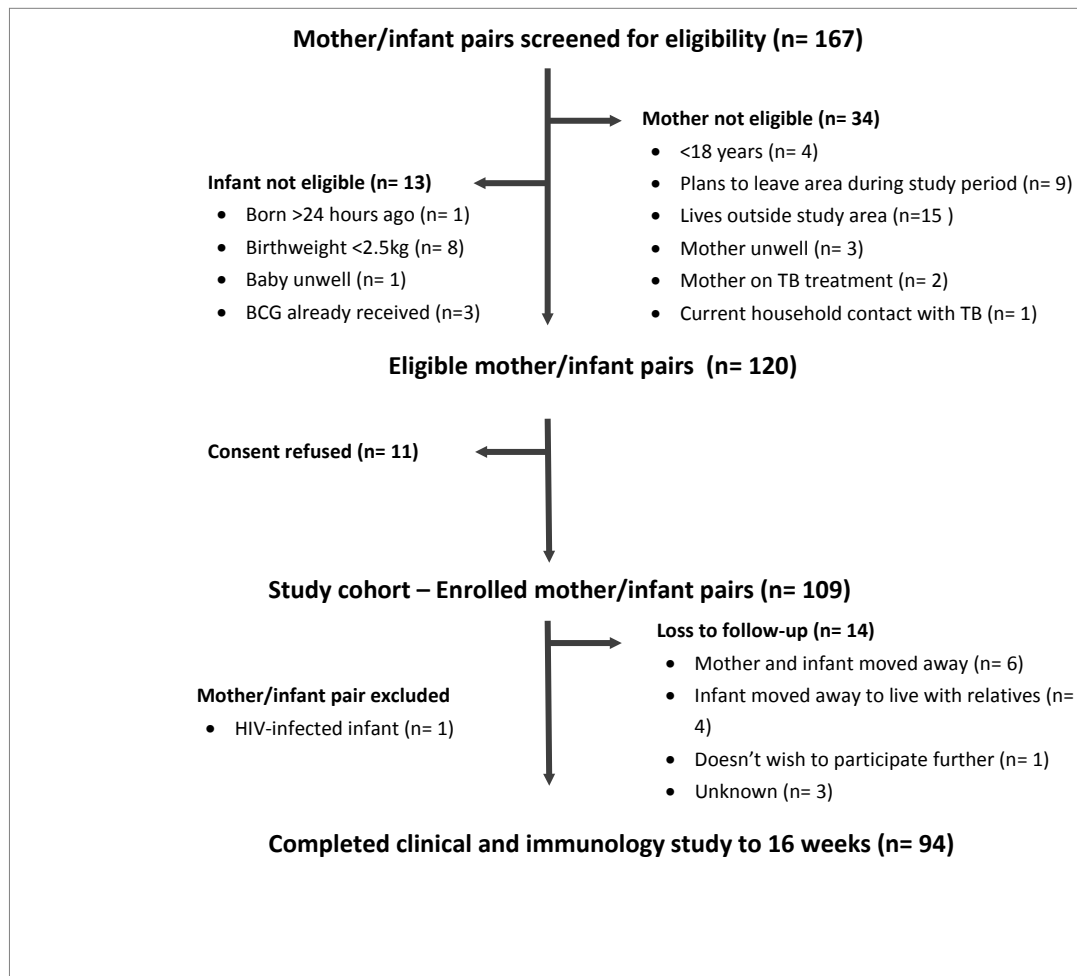

Study cohort flow chart

## Supplementary Digital Content 2

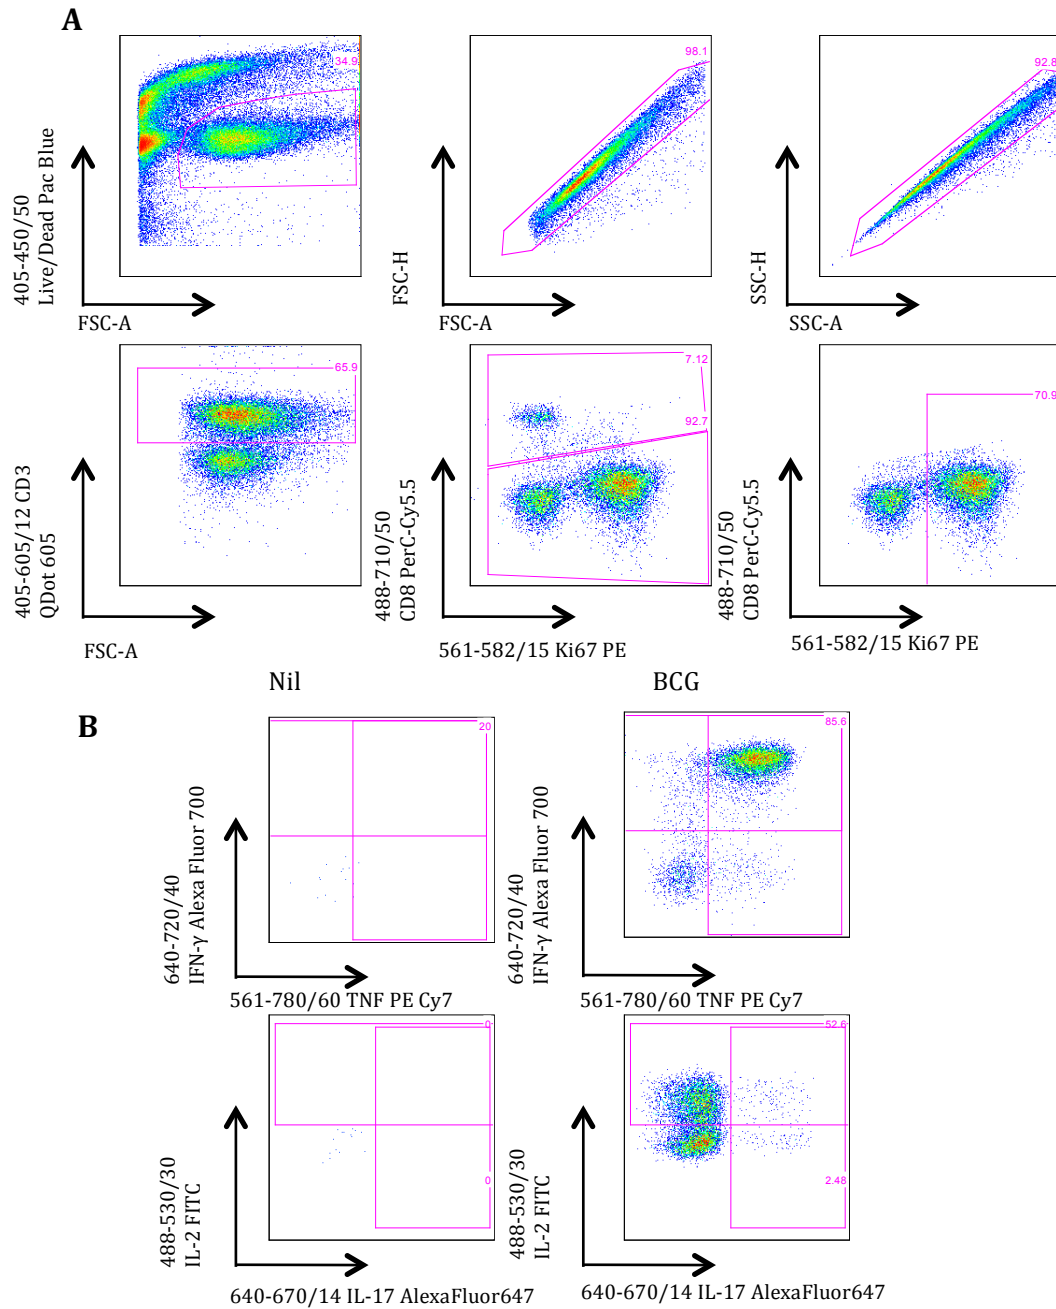

**Hierarchical gating strategy for selection of CD4<sup>+</sup> proliferating T cells expressing intracellular cytokines in response to BCG antigens.**

Representative dot plots from a single 16 week old infant are shown. (A) Gating strategy used to identify CD4<sup>+</sup> proliferating cells T cells. From left to right, live cells were identified from dead cells using a viability dye and cell doublets excluded with forward scatter area

versus forward scatter height parameters, followed by side scatter area versus side scatter height. T cells were identified by positive staining for the CD3 cell surface marker and subsequently differentiated into CD4<sup>+</sup> and CD8<sup>+</sup> T cells. Proliferating CD4<sup>+</sup> T cells were then identified by selecting CD4<sup>+</sup>Ki67<sup>+</sup> T cells. (B) Representative dot plots of cytokine expression in CD4<sup>+</sup>Ki67<sup>+</sup> T cells from unstimulated and BCG stimulated conditions in the same 16 week old infant. Gates for proliferating CD4<sup>+</sup> T cells expressing cytokines were set using the unstimulated control. The filters used are specified in association with the laser, eg 488-530/30 indicates the blue laser and the 530/30 filter.

### **Supplementary Digital Content 3**

Customised plates (MILLIPLEX MAP) were used to quantify 20 cytokines and chemokines in supernatants collected after 24 hours of culture: Epidermal growth factor (EGF), fractalkine, granulocyte-macrophage colony stimulating factor (GM-CSF), interleukin(IL)-1 receptor antagonist (IL-1RA), IL-12p40, IL-17, interferon- $\gamma$  (IFN- $\gamma$ ), inducible protein 10 (IP-10 or CXCL10), monocyte chemoattractant protein-1 (MCP-1 or CCL2), monocyte derived chemokine (MDC), macrophage inhibitory protein-1  $\beta$  (MIP-1 $\beta$ , CCL4), soluble CD40 ligand (sCD40L), tumournecrosis factor- $\alpha$  (TNF- $\alpha$ ), IL-1 $\beta$ , IL-2, IL-6, IL-7, IL-8 (CXCL8), IL-10 and IL-13.

#### Supplemental Digital Content 4

|                               | HIV-infected mothers and their uninfected infants (n=46) | HIV-uninfected mothers and their infants (n=62)         | p value |
|-------------------------------|----------------------------------------------------------|---------------------------------------------------------|---------|
| Median age in years (IQR)     | 27.5 (24 – 31.25)                                        | 24 (20 - 27.25)                                         | .001    |
| Normal vaginal delivery       | 46 (100%)                                                | 62 (100%)                                               | 1.00    |
| Primigravidity                | 12 (26%)                                                 | 30 (48%)                                                | .02     |
| Informal housing structure    | 36 (79%)                                                 | 34 (55%)                                                | .01     |
| Infant gestation, weeks (IQR) | 38 <sup>+3</sup> (37 <sup>+1</sup> - 39 <sup>+6</sup> )  | 38 <sup>+4</sup> (35 <sup>+1</sup> - 40 <sup>+1</sup> ) | .36     |
| Female infant                 | 26 (57%)                                                 | 34 (55%)                                                | 1.00    |
| Infant birth weight, kg (IQR) | 3.13 (2.90 - 3.45)                                       | 3.12 (2.98 - 3.47)                                      | .59     |
| Infant breast fed at birth    | 0 (0%)*                                                  | 62 (100%)                                               | < .001  |

#### Characteristics of study cohort.

\* All HIV-infected mothers chose exclusive replacement feeding and continued this practice through the study period; this was routine practice at this time in this setting

## Supplemental Digital Content 5

| Group (maternal infection status) | n  | CD8 <sup>+</sup> Ki67 <sup>+</sup><br>IFN- $\gamma$ <sup>+</sup> | CD8 <sup>+</sup> Ki67 <sup>+</sup><br>TNF- $\alpha$ <sup>+</sup> | CD8 <sup>+</sup> Ki67 <sup>+</sup><br>IL-2 <sup>+</sup> | CD8 <sup>+</sup> Ki67 <sup>+</sup><br>IL-17 <sup>+</sup> |
|-----------------------------------|----|------------------------------------------------------------------|------------------------------------------------------------------|---------------------------------------------------------|----------------------------------------------------------|
| HIV- QFN -                        | 15 | 0.07%<br>(0.00 – 0.37)                                           | 0.23%<br>(0.09 – 0.87)                                           | 0.22%<br>(0.08 – 1.08)                                  | 0.07%<br>(0.00 – 0.22)                                   |
| HIV- QFN +                        | 20 | 0.11%<br>(0.00 – 0.97)                                           | 0.30%<br>(0.02 – 1.31)                                           | 0.18%<br>(0.00 – 1.15)                                  | 0.00%<br>(0.00 – 0.08)                                   |
| HIV <sup>+</sup> QFN -            | 9  | 0.12%<br>(0.00 – 0.65)                                           | 0.38%<br>(0.01 – 1.59)                                           | 0.14%<br>(0.02 – 1.00)                                  | 0.00%<br>(0.00 – 0.21)                                   |
| HIV <sup>+</sup> QFN +            | 8  | 0.44%<br>(0.13 – 1.84)                                           | 1.96%<br>(0.30 – 5.29)                                           | 0.50%<br>(0.21 – 1.49)                                  | 0.07%<br>(0.00 – 0.36)                                   |
| <b>Total</b>                      | 52 | 0.14%<br>(0.00 – 0.56)                                           | 0.39%<br>(0.05 – 1.62)                                           | 0.21%<br>(0.08 - 1.06)                                  | 0.02%<br>(0.00-0.20%)                                    |

  

| Group (maternal infection status) | n  | CD8 <sup>+</sup> Ki67 <sup>+</sup><br>IFN- $\gamma$ <sup>+</sup> | CD8 <sup>+</sup> Ki67 <sup>+</sup><br>TNF- $\alpha$ <sup>+</sup> | CD8 <sup>+</sup> Ki67 <sup>+</sup><br>IL-2 <sup>+</sup> | CD8 <sup>+</sup> Ki67 <sup>+</sup><br>IL-17 <sup>+</sup> |
|-----------------------------------|----|------------------------------------------------------------------|------------------------------------------------------------------|---------------------------------------------------------|----------------------------------------------------------|
| HIV- QFN -                        | 15 | 0.11%<br>(0.00 – 0.44)                                           | 0.16%<br>(0.00 – 1.09)                                           | 0.13%<br>(0.00 – 0.80)                                  | 0.06%<br>(0.00 – 0.58)                                   |
| HIV- QFN +                        | 20 | 0.13%<br>(0.00 – 0.81)                                           | 0.24%<br>(0.00 – 0.62)                                           | 0.24%<br>(0.03 – 1.41)                                  | 0.00%<br>(0.00 – 0.10)                                   |
| HIV <sup>+</sup> QFN -            | 9  | 0.15%<br>(0.06 – 0.69)                                           | 0.34%<br>(0.00 – 0.53)                                           | 0.11%<br>(0.00 – 0.34)                                  | 0.07%<br>(0.00 – 0.29)                                   |
| HIV <sup>+</sup> QFN +            | 8  | 0.01%<br>(0.00 – 3.07)                                           | 0.49%<br>(0.05 - 4.01)                                           | 0.02%<br>(0.00 - 0.20)                                  | 0.37%<br>(0.00 – 0.48)                                   |
| <b>Total</b>                      | 52 | 0.14%<br>(0.00 – 0.66)                                           | 0.24%<br>(0.00 – 0.65)                                           | 0.10%<br>(0.00 – 0.79)                                  | 0.06%<br>(0.00 – 0.37)                                   |

### Median (IQR) frequencies of BCG-specific CD4<sup>+</sup> and CD8<sup>+</sup> Ki67<sup>+</sup> T cells expressing intracellular cytokines in infants at birth.

Groups of infants based on maternal HIV infection and *Mtb* sensitization, defined by the QFN test. There were a reduced number of samples analysed due to the reduced viability of T cells in the infant birth samples after 6 days of culture. Number of samples analysed are given in table, except for IL-17<sup>+</sup> CD4<sup>+</sup>T cells were the number of samples analysed were: HIV- QFN - 11; HIV- QFN+ 17; HIV+ QFN – 7; HIV+ QFN + 7. Differences between groups were not statistically significant as calculated by the Kruskal-Wallis test.

Intracellular cytokine expression in  
BCG-specific proliferating CD8<sup>+</sup> T Cells

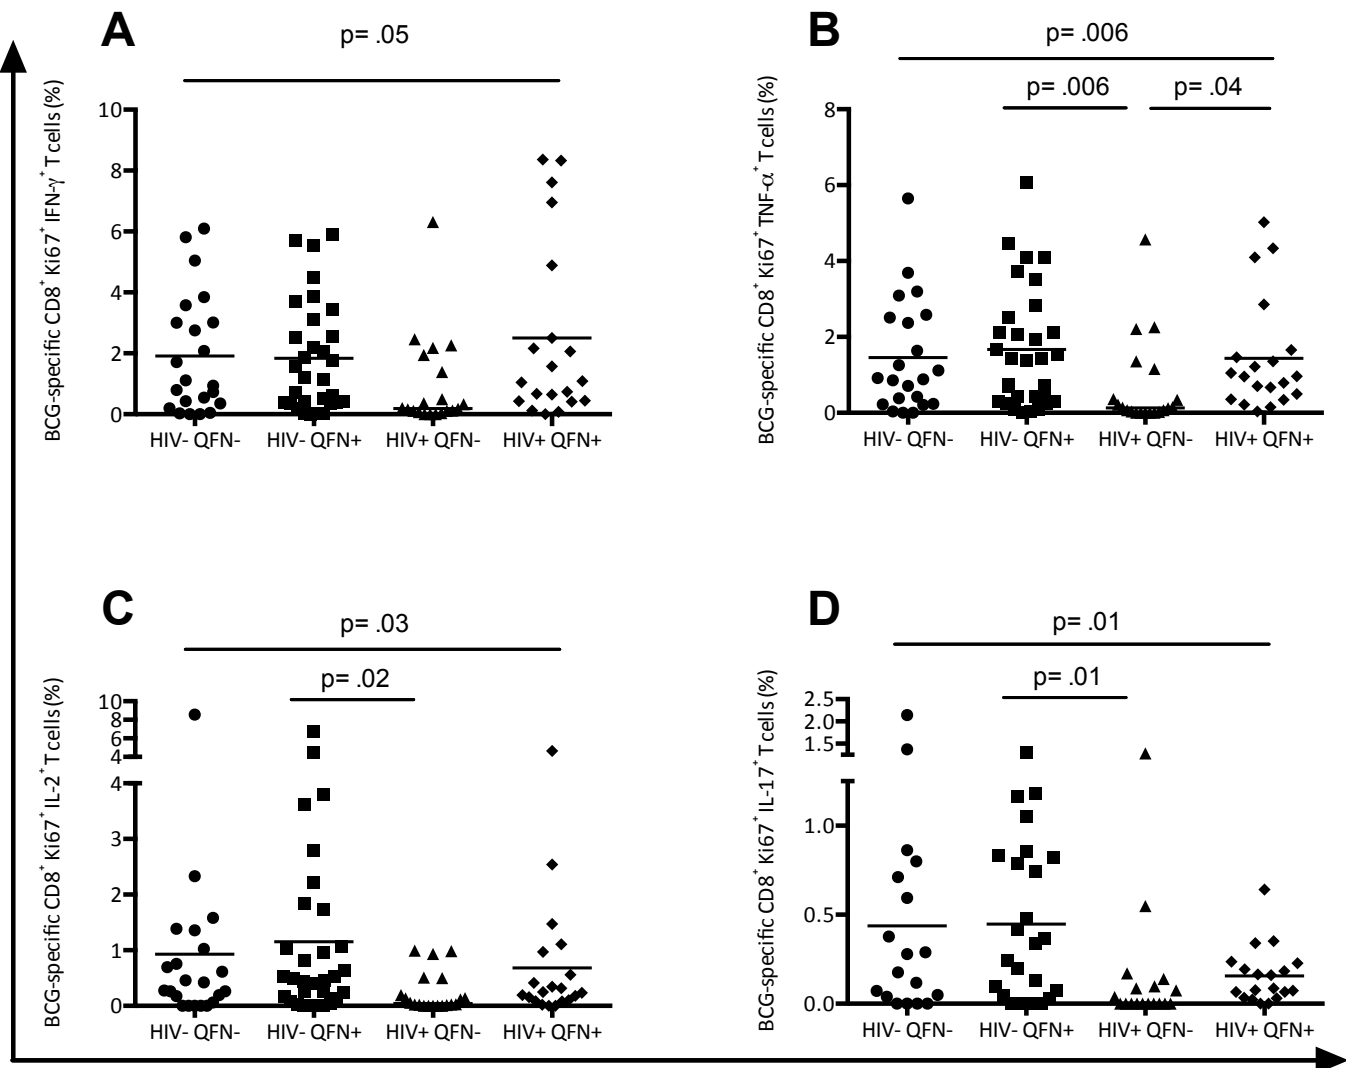

Maternal HIV and *Mtb* sensitization status

Supplemental Digital Content 7

|                      |              | Mother and newborn infant correlations |                        |                        |                        | Mother and 16 week old infant correlations |                        |                        |                        |
|----------------------|--------------|----------------------------------------|------------------------|------------------------|------------------------|--------------------------------------------|------------------------|------------------------|------------------------|
| Cytokine / chemokine |              | HIV-<br>QFN-<br>(n=27)                 | HIV-<br>QFN+<br>(n=34) | HIV+<br>QFN-<br>(n=24) | HIV+<br>QFN+<br>(n=21) | HIV-<br>QFN-<br>(n=22)                     | HIV-<br>QFN+<br>(n=32) | HIV+<br>QFN-<br>(n=17) | HIV+<br>QFN+<br>(n=17) |
|                      | IL-1 $\beta$ | $r_s$                                  | <b>0.53</b>            | <b>0.59</b>            | <b>0.63</b>            | <b>0.57</b>                                | 0.22                   | -0.08                  | -0.13                  |
| p                    |              | <b>&lt;0.01</b>                        | <b>&lt;0.01</b>        | <b>&lt;0.01</b>        | <b>&lt;0.01</b>        | 0.32                                       | 0.66                   | 0.61                   | 0.62                   |
| IL-6                 | $r_s$        | <b>0.46</b>                            | <b>0.51</b>            | 0.3                    | <b>0.61</b>            | 0.10                                       | 0.24                   | -0.13                  | -0.13                  |
|                      | p            | <b>0.02</b>                            | <b>&lt;0.01</b>        | 0.15                   | <b>&lt;0.01</b>        | 0.65                                       | 0.18                   | 0.61                   | 0.62                   |
| IL-10                | $r_s$        | <b>0.47</b>                            | <b>0.52</b>            | 0.32                   | 0.11                   | 0.22                                       | -0.01                  | -0.15                  | 0.37                   |
|                      | p            | <b>0.01</b>                            | <b>&lt;0.01</b>        | 0.12                   | 0.64                   | 0.33                                       | 0.96                   | 0.56                   | 0.14                   |
| IL-12p40             | $r_s$        | 0.32                                   | 0.24                   | 0.44                   | 0.36                   | 0.14                                       | 0.49                   | 0.25                   | 0.48                   |
|                      | p            | 0.11                                   | 0.18                   | 0.03                   | 0.11                   | 0.55                                       | <b>&lt;0.01</b>        | 0.32                   | 0.05                   |
| IL-1ra               | $r_s$        | <b>0.51</b>                            | 0.31                   | 0.35                   | 0.21                   | 0.30                                       | 0.14                   | 0.07                   | 0.16                   |
|                      | p            | <b>&lt;0.01</b>                        | 0.07                   | 0.09                   | 0.36                   | 0.17                                       | 0.43                   | 0.79                   | 0.54                   |
| GM-CSF               | $r_s$        | <b>0.5</b>                             | 0.33                   | 0.06                   | 0.4                    | 0.31                                       | -0.02                  | -0.04                  | 0.2                    |
|                      | p            | <b>&lt;0.01</b>                        | 0.06                   | 0.79                   | 0.07                   | 0.17                                       | 0.23                   | 0.87                   | 0.44                   |
| IFN- $\gamma$        | $r_s$        | 0.13                                   | 0.35                   | -0.06                  | 0.07                   | 0.43                                       | -0.1                   | 0.0                    | 0.40                   |
|                      | p            | 0.50                                   | 0.04                   | 0.77                   | 0.78                   | 0.05                                       | 0.58                   | 1.0                    | 0.11                   |
| MCP-1                | $r_s$        | -0.04                                  | <b>0.37</b>            | 0.34                   | 0.08                   | <b>0.51</b>                                | 0.25                   | -0.20                  | -0.04                  |
|                      | p            | 0.86                                   | <b>0.03</b>            | 0.10                   | 0.72                   | <b>0.01</b>                                | 0.17                   | 0.44                   | 0.89                   |
| TNF- $\alpha$        | $r_s$        | 0.37                                   | <b>0.59</b>            | <b>0.46</b>            | <b>0.45</b>            | 0.06                                       | <b>0.43</b>            | <b>0.01</b>            | 0.21                   |
|                      | p            | 0.06                                   | <b>&lt;0.01</b>        | <b>0.02</b>            | <b>0.04</b>            | 0.79                                       | <b>0.01</b>            | <b>0.97</b>            | 0.42                   |

**Associations between concentrations of cytokines and chemokines in mothers and infants at infants at birth and at 16 weeks of post-natal age.**

Only cytokines or chemokines will any significant association found in any group or time points are shown.



Supplemental Digital Content 8

| Group                                               | Time point | n        | CD8 <sup>+</sup> Ki67 <sup>+</sup> |                            |                   |                    |
|-----------------------------------------------------|------------|----------|------------------------------------|----------------------------|-------------------|--------------------|
|                                                     |            |          | IFN- $\gamma$ <sup>+</sup>         | TNF- $\alpha$ <sup>+</sup> | IL-2 <sup>+</sup> | IL-17 <sup>+</sup> |
| HIV- QFN -                                          | Birth      | 7 (4)    | 0.08 (0.06)                        | 0.18 (0.21)                | 0.49 (0.86)       | 0.82 (2.68)        |
| HIV- QFN -                                          | 16 weeks   |          | 24.1 (3.93)                        | 22.75 (2.94)               | 14.78 (1.65)      | 8.02 (6.67)        |
| HIV- QFN +                                          | Birth      | 16(13)   | 0.29 (0.27)                        | 0.66 (0.57)                | 0.48 (0.48)       | 0.09 (0.84)        |
| HIV- QFN +                                          | 16 weeks   |          | 21.12 (4.76)                       | 20.93 (4.75)               | 13.27 (2.56)      | 3.47 (1.31)        |
| HIV+ QFN -                                          | Birth      | 4 (3)    | 0.16 (0.16)                        | 0.50 (0.36)                | 0.39 (0.5)        | 0.05 (0.15)        |
| HIV+ QFN -                                          | 16 weeks   |          | 30.54 (0.24)                       | 33.71 (0.35)               | 13.7 (1.1)        | 8.46 (4.03)        |
| HIV+ QFN +                                          | Birth      | 5 (5)    | 1.36 (0.48)                        | 3.03 (0.88)                | 1.24 (0.88)       | 0.03 (0.05)        |
| HIV+ QFN +                                          | 16 weeks   |          | 22.88 (9.72)                       | 22.75 (7.5)                | 14.69 (6.59)      | 2.73 (2.59)        |
| <b>Cohort (Birth)</b>                               |            | 32(25)   | 0.32 (0.3)                         | 0.74 (0.64)                | 0.57 (0.58)       | 0.13 (0.84)        |
| <b>Cohort (16 weeks)</b>                            |            |          | 23.14 (4.43)                       | 23.06 (4.03)               | 13.87 (2.52)      | 4.42 (2.5)         |
| <b>Effect of time</b>                               |            | <b>p</b> | <b>&lt; .0005</b>                  | <b>&lt; .0005</b>          | <b>&lt; .0005</b> | <b>&lt; .0005</b>  |
| <b>Effect of time and maternal infection status</b> |            | <b>p</b> | <b>0.76</b>                        | <b>0.55</b>                | <b>0.98</b>       | <b>0.76</b>        |

| Group                                               | Time point | n        | CD8 <sup>+</sup> Ki67 <sup>+</sup> |                            |                   |                    |
|-----------------------------------------------------|------------|----------|------------------------------------|----------------------------|-------------------|--------------------|
|                                                     |            |          | IFN- $\gamma$ <sup>+</sup>         | TNF- $\alpha$ <sup>+</sup> | IL-2 <sup>+</sup> | IL-17 <sup>+</sup> |
| HIV- QFN -                                          | Birth      | 7 (4)    | 0.09 (0.06)                        | 0.1 (0.17)                 | 0.22 (0.11)       | 0.1 (0.28)         |
| HIV- QFN -                                          | 16 weeks   |          | 5.24 (3.32)                        | 2.42 (1.62)                | 0.79 (0.57)       | 0.32 (0.19)        |
| HIV- QFN +                                          | Birth      | 16(13)   | 0.32 (0.47)                        | 0.39 (0.45)                | 0.43 (0.4)        | 0.12 (0.81)        |
| HIV- QFN +                                          | 16 weeks   |          | 4.66 (0.86)                        | 3.74 (0.82)                | 2.34 (0.67)       | 2.00 (2.28)        |
| HIV+ QFN -                                          | Birth      | 4 (3)    | 0.29 (0.04)                        | 0.22 (0.1)                 | 0.14 (0.08)       | 0.02 (0.02)        |
| HIV+ QFN -                                          | 16 weeks   |          | 10.17 (1.56)                       | 8.14 (0.7)                 | 2.69 (0.37)       | 4.94 (10.71)       |
| HIV+ QFN +                                          | Birth      | 5 (5)    | 1.31 (1.33)                        | 1.72 (1.01)                | 0.17 (0.41)       | 0.10 (0.07)        |
| HIV+ QFN +                                          | 16 weeks   |          | 5.30 (1.14)                        | 4.88 (0.93)                | 2.17 (0.64)       | 2.09 (1.44)        |
| <b>Cohort (birth)</b>                               |            | 32(25)   | 0.35 (0.49)                        | 0.41 (0.49)                | 0.29 (0.29)       | 0.10 (0.46)        |
| <b>Cohort (16 weeks)</b>                            |            |          | 5.47 (1.46)                        | 4.04 (1.05)                | 1.94 (0.63)       | 1.91 (2.5)         |
| <b>Effect of time</b>                               |            | <b>p</b> | <b>&lt; .0005</b>                  | <b>&lt; .0005</b>          | <b>&lt; .0005</b> | <b>0.003</b>       |
| <b>Effect of time and maternal infection status</b> |            | <b>p</b> | <b>0.45</b>                        | <b>0.33</b>                | <b>0.29</b>       | <b>0.47</b>        |

The frequency of BCG-specific CD4<sup>+</sup> and CD8<sup>+</sup> T cells expressing IFN- $\gamma$ , TNF- $\gamma$ , IL-2 or IL-17 in paired infants at birth and 16 weeks of age.

A reduced number of paired samples were available for analysis of IL-17 CD4<sup>+</sup> T cells and are indicated in parentheses. A mixed ANOVA model was used to assess differences between groups.

Intracellular cytokine expression in  
BCG-specific proliferating CD8<sup>+</sup> T Cells

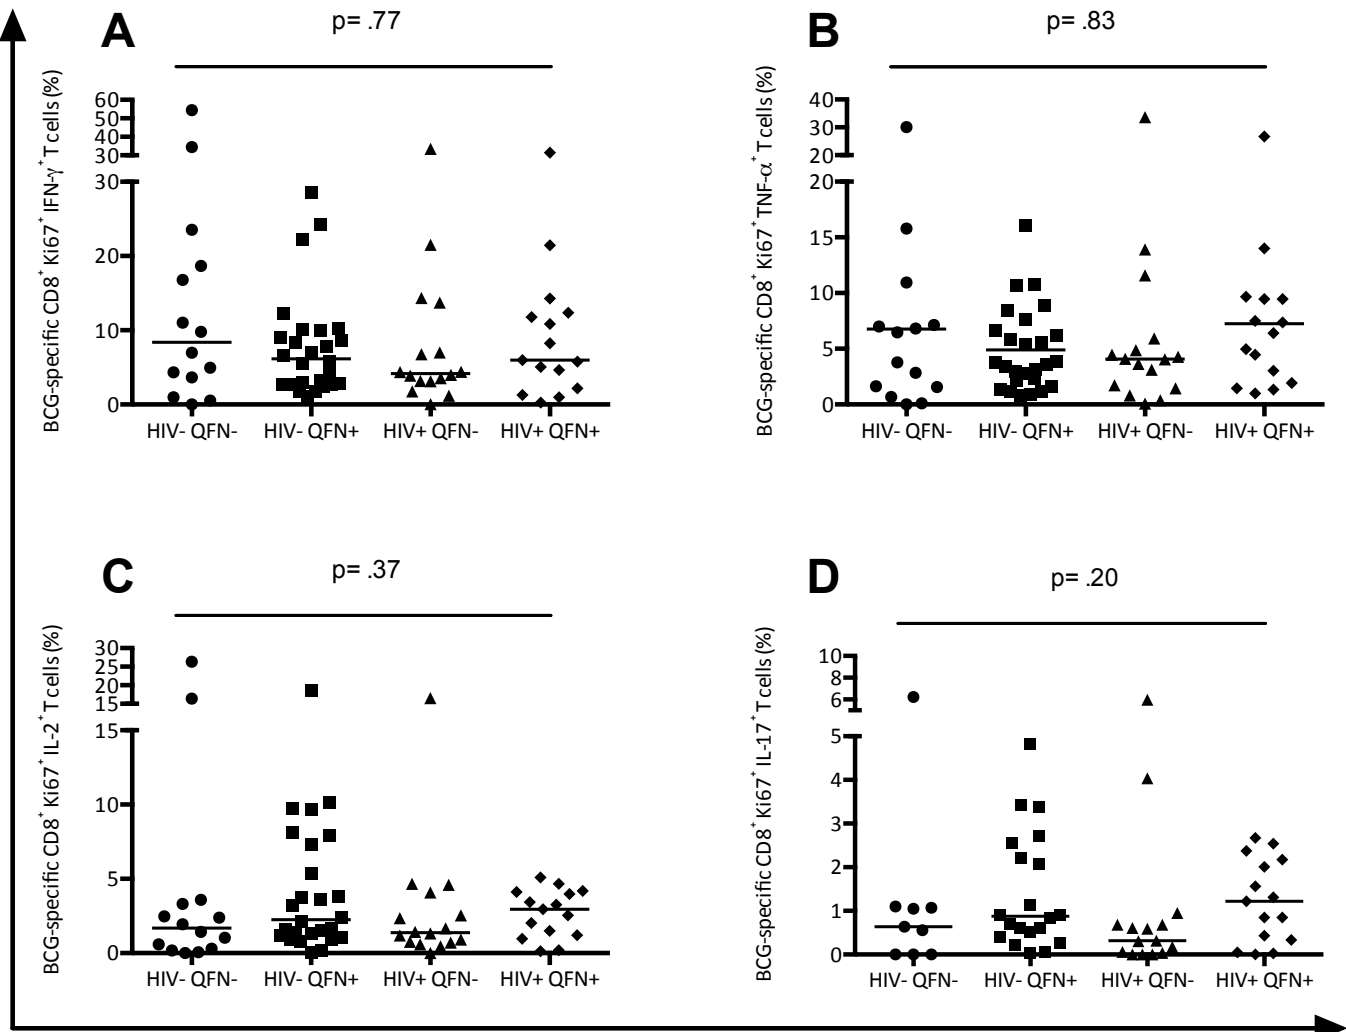

## Supplemental Digital Content 10

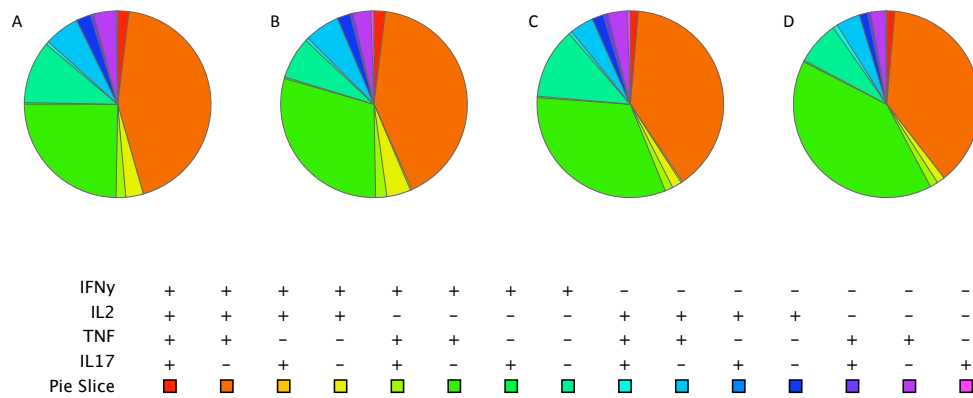

### Relative frequencies of BCG-specific CD4<sup>+</sup> T cell subsets in 16 week old infants.

Groups of infants defined by maternal infection status: (A) HIV- QFN - (B) HIV- QFN + (C)

HIV+ QFN- and (D) HIV+ QFN+
